# Supplementary material
Source: publisher figshare collection journal article supplement (https://geolsoc.figshare.com/ndownloader/files/14811992)
Supplement: Supplementary file 1 [file 14811992]

Table 1 Zircon U–Pb analytical data of Gongpoquan volcanic rocks in the Xiaohuangshan area.

1.1 LA-ICP MS data

| Spots | 238U  (ppm) | 232Th  (ppm) | 232Th/238U | Ratio | | | | | | | | | |  | Age | | | | | | | |
| --- | --- | --- | --- | --- | --- | --- | --- | --- | --- | --- | --- | --- | --- | --- | --- | --- | --- | --- | --- | --- | --- | --- |
| 207Pb*/206Pb* | |  | | | 207Pb*/235U | |  | 206Pb*/238U | |  | 207Pb*/206Pb* | |  | 207Pb*/235U | |  | 206Pb*/238U | |
| ratio | ±% |  | | | ratio | ±% |  | ratio | ±% |  | age | ±1σ |  | age | ±1σ |  | age | ±1σ |
| BS19-1 (41º23´48.4´´N, 99º20´30.6´´E) | | | | | | | | |  |  |  |  |  |  |  |  |  |  |  |  |  |  |
| 1 | 322.4 | 195.6 | 0.61 | 0.0555 | 0.0003 | | |  | 0.5412 | 0.0091 |  | 0.0707 | 0.0012 |  | 431.5 | 11.1 |  | 439.2 | 6.0 |  | 440.6 | 7.3 |
| 2 | 404.0 | 128.7 | 0.32 | 0.0597 | 0.0003 | | |  | 0.5545 | 0.0085 |  | 0.0674 | 0.0010 |  | 590.8 | 11.1 |  | 448.0 | 5.6 |  | 420.3 | 6.3 |
| 3 | 131.3 | 182.8 | 1.39 | 0.0554 | 0.0005 | | |  | 0.5195 | 0.0094 |  | 0.0680 | 0.0012 |  | 427.8 | 22.2 |  | 424.8 | 6.3 |  | 424.2 | 7.3 |
| 4 | 123.4 | 103.7 | 0.84 | 0.0592 | 0.0005 | | |  | 0.5742 | 0.0122 |  | 0.0703 | 0.0012 |  | 576.0 | 30.5 |  | 460.7 | 7.9 |  | 437.8 | 7.1 |
| 5 | 124.7 | 148.5 | 1.19 | 0.0550 | 0.0004 | | |  | 0.5220 | 0.0116 |  | 0.0689 | 0.0015 |  | 409.3 | 16.7 |  | 426.5 | 7.8 |  | 429.3 | 9.3 |
| 6 | 101.9 | 82.3 | 0.81 | 0.0558 | 0.0009 | | |  | 0.5263 | 0.0121 |  | 0.0684 | 0.0011 |  | 455.6 | 38.9 |  | 429.3 | 8.1 |  | 426.3 | 7.0 |
| 7 | 175.8 | 212.5 | 1.21 | 0.0600 | 0.0012 | | |  | 0.5671 | 0.0139 |  | 0.0686 | 0.0018 |  | 605.6 | 38.9 |  | 456.1 | 9.1 |  | 427.7 | 10.9 |
| 8 | 316.1 | 138.8 | 0.44 | 0.0608 | 0.0007 | | |  | 0.5675 | 0.0114 |  | 0.0677 | 0.0014 |  | 633.0 | 13.9 |  | 456.4 | 7.4 |  | 422.1 | 8.5 |
| 9 | 101.6 | 107.3 | 1.06 | 0.0575 | 0.0011 | | |  | 0.5331 | 0.0149 |  | 0.0672 | 0.0014 |  | 522.3 | 44.4 |  | 433.8 | 9.9 |  | 419.2 | 8.8 |
| 10 | 777.9 | 166.8 | 0.21 | 0.0556 | 0.0003 | | |  | 0.5168 | 0.0111 |  | 0.0674 | 0.0014 |  | 435.2 | 11.1 |  | 423.0 | 7.5 |  | 420.4 | 8.7 |
| 11 | 153.9 | 78 | 0.51 | 0.0562 | 0.0003 | | |  | 0.5320 | 0.0118 |  | 0.0686 | 0.0015 |  | 461.2 | 11.1 |  | 433.1 | 7.9 |  | 427.9 | 9.1 |
| 12 | 333.2 | 137.7 | 0.41 | 0.0567 | 0.0004 | | |  | 0.5429 | 0.0135 |  | 0.0693 | 0.0015 |  | 483.4 | 16.7 |  | 440.3 | 8.9 |  | 432.2 | 9.2 |
| 13 | 1073.6 | 592.9 | 0.55 | 0.0559 | 0.0003 | | |  | 0.5353 | 0.0106 |  | 0.0694 | 0.0014 |  | 450.0 | -2.8 |  | 435.3 | 7.1 |  | 432.5 | 8.3 |
| 14 | 127.1 | 230.2 | 1.81 | 0.0553 | 0.0006 | | |  | 0.5160 | 0.0121 |  | 0.0676 | 0.0013 |  | 433.4 | 27.8 |  | 422.5 | 8.2 |  | 421.7 | 8.2 |
| 15 | 116.5 | 150.4 | 1.29 | 0.0555 | 0.0005 | | |  | 0.5272 | 0.0119 |  | 0.0688 | 0.0014 |  | 435.2 | 22.2 |  | 430.0 | 8.0 |  | 429.0 | 8.6 |
| 16 | 691.8 | 316.5 | 0.46 | 0.0558 | 0.0003 | | |  | 0.5241 | 0.0103 |  | 0.0681 | 0.0013 |  | 455.6 | 11.1 |  | 427.9 | 6.9 |  | 424.5 | 8.0 |
| 17 | 87.5 | 97.3 | 1.11 | 0.0571 | 0.0006 | | |  | 0.5437 | 0.0105 |  | 0.0691 | 0.0014 |  | 494.5 | 22.2 |  | 440.8 | 7.0 |  | 430.8 | 8.3 |
| 18 | 102.7 | 71.5 | 0.70 | 0.0550 | 0.0005 | | |  | 0.5212 | 0.0115 |  | 0.0687 | 0.0015 |  | 413.0 | 22.2 |  | 426.0 | 7.7 |  | 428.3 | 8.9 |
| 19 | 190.6 | 320.6 | 1.68 | 0.0548 | 0.0004 | | |  | 0.5165 | 0.0102 |  | 0.0683 | 0.0014 |  | 405.6 | 16.7 |  | 422.8 | 6.9 |  | 426.1 | 8.6 |
| 20 | 762.3 | 518.3 | 0.68 | 0.0552 | 0.0003 | | |  | 0.5250 | 0.0093 |  | 0.0690 | 0.0013 |  | 420.4 | 25.0 |  | 428.5 | 6.2 |  | 430.2 | 7.8 |
| Mean age | |  |  |  |  | | |  |  |  |  |  |  |  |  |  |  |  |  |  | **427.6** | **3.6** |
| BS20-4 (41º23´26.3´´N, 99º22´13.6´´E) | | | | | | | | | |  |  |  |  |  |  |  |  |  |  |  |  |  |
| 1 | 72.3 | 26.9 | 0.37 | 0.54842 | 0.02209 | | |  | 0.54842 | 0.02209 |  | 0.07013 | 0.00201 |  | 481 | 43 |  | 444 | 14 |  | 437 | 12 |
| 2 | 91.4 | 43.7 | 0.48 | 0.54724 | 0.01972 | | |  | 0.54724 | 0.01972 |  | 0.06968 | 0.00197 |  | 490 | 37 |  | 443 | 13 |  | 434 | 12 |
| 3 | 50.5 | 21.7 | 0.43 | 0.63696 | 0.02928 | | |  | 0.63696 | 0.02928 |  | 0.08026 | 0.00233 |  | 513 | 53 |  | 500 | 18 |  | 498 | 14 |
| 4 | 123.5 | 38.0 | 0.31 | 0.55577 | 0.02853 | | |  | 0.55577 | 0.02853 |  | 0.06977 | 0.00207 |  | 521 | 62 |  | 449 | 19 |  | 435 | 12 |
| 5 | 69.8 | 18.5 | 0.26 | 0.54609 | 0.02572 | | |  | 0.54609 | 0.02572 |  | 0.0698 | 0.00203 |  | 481 | 55 |  | 442 | 17 |  | 435 | 12 |
| 6 | 65.6 | 24.2 | 0.37 | 0.55376 | 0.02469 | | |  | 0.55376 | 0.02469 |  | 0.06957 | 0.00201 |  | 519 | 50 |  | 447 | 16 |  | 434 | 12 |
| 7 | 134.8 | 89.5 | 0.66 | 0.53584 | 0.01732 | | |  | 0.53584 | 0.01732 |  | 0.06981 | 0.00194 |  | 439 | 32 |  | 436 | 11 |  | 435 | 12 |
| 8 | 114.8 | 82.6 | 0.72 | 0.64622 | 0.02837 | | |  | 0.64622 | 0.02837 |  | 0.08155 | 0.00234 |  | 509 | 49 |  | 506 | 17 |  | 505 | 14 |
| 9 | 111.0 | 59.5 | 0.54 | 0.58772 | 0.01788 | | |  | 0.58772 | 0.01788 |  | 0.07521 | 0.00207 |  | 479 | 30 |  | ~~469~~ | ~~11~~ |  | 467 | 12 |
| 10 | 78.3 | 33.0 | 0.42 | 0.53474 | 0.02907 | | |  | 0.53474 | 0.02907 |  | 0.06979 | 0.00207 |  | 435 | 70 |  | 435 | 19 |  | 435 | 12 |
| 11 | 84.2 | 25.6 | 0.30 | 0.65093 | 0.02431 | | |  | 0.65093 | 0.02431 |  | 0.08194 | 0.0023 |  | 515 | 39 |  | 509 | 15 |  | 508 | 14 |
| 12 | 85.0 | 36.7 | 0.43 | 0.6504 | 0.02138 | | |  | 0.6504 | 0.02138 |  | 0.08198 | 0.00226 |  | 512 | 33 |  | 509 | 13 |  | 508 | 13 |
| 13 | 89.8 | 41.8 | 0.47 | 0.63743 | 0.02551 | | |  | 0.63743 | 0.02551 |  | 0.08023 | 0.00226 |  | 515 | 43 |  | 501 | 16 |  | 497 | 13 |
| 14 | 127.9 | 55.9 | 0.44 | 0.64837 | 0.02608 | | |  | 0.64837 | 0.02608 |  | 0.08169 | 0.0023 |  | 513 | 43 |  | 507 | 16 |  | 506 | 14 |
| 15 | 102.9 | 38.4 | 0.37 | 0.54491 | 0.02068 | | |  | 0.54491 | 0.02068 |  | 0.06955 | 0.00194 |  | 484 | 40 |  | 442 | 14 |  | 433 | 12 |
| 16 | 117.5 | 47.5 | 0.40 | 0.53776 | 0.01692 | | |  | 0.53776 | 0.01692 |  | 0.06971 | 0.00191 |  | 450 | 31 |  | 437 | 11 |  | 434 | 12 |
| 17 | 330.8 | 62.4 | 0.19 | 0.53243 | 0.01596 | | |  | 0.53243 | 0.01596 |  | 0.06954 | 0.00189 |  | 433 | 30 |  | 433 | 11 |  | 433 | 11 |
| 18 | 68.6 | 42.8 | 0.62 | 0.6457 | 0.02347 | | |  | 0.6457 | 0.02347 |  | 0.08151 | 0.00224 |  | 508 | 38 |  | 506 | 14 |  | 505 | 13 |
| 19 | 66.7 | 32.5 | 0.49 | 0.55534 | 0.01882 | | |  | 0.55534 | 0.01882 |  | 0.06967 | 0.0019 |  | 522 | 34 |  | 448 | 12 |  | 434 | 11 |
| 20 | 262.9 | 94.0 | 0.36 | 0.53794 | 0.01542 | | |  | 0.53794 | 0.01542 |  | 0.06976 | 0.00187 |  | 449 | 28 |  | 437 | 10 |  | 435 | 11 |
| 21 | 79.0 | 34.0 | 0.43 | 0.5467 | 0.01982 | | |  | 0.5467 | 0.01982 |  | 0.06971 | 0.00191 |  | 486 | 38 |  | 443 | 13 |  | 434 | 12 |
| 22 | 80.4 | 38.7 | 0.48 | 0.53413 | 0.02018 | | |  | 0.53413 | 0.02018 |  | 0.06953 | 0.00191 |  | 440 | 40 |  | 435 | 13 |  | 433 | 12 |
| 23 | 44.6 | 20.6 | 0.46 | 0.52941 | 0.03173 | | |  | 0.52941 | 0.03173 |  | 0.06896 | 0.00205 |  | 439 | 81 |  | 431 | 21 |  | 430 | 12 |
| 24 | 50.3 | 22.6 | 0.45 | 0.53989 | 0.0238 | | |  | 0.53989 | 0.0238 |  | 0.06993 | 0.00195 |  | 452 | 51 |  | 438 | 16 |  | 436 | 12 |
| 25 | 93.3 | 44.1 | 0.47 | 0.53741 | 0.01693 | | |  | 0.53741 | 0.01693 |  | 0.0699 | 0.00188 |  | 442 | 31 |  | 437 | 11 |  | 436 | 11 |
| 26 | 129.1 | 44.4 | 0.34 | 0.5401 | 0.0167 | | |  | 0.5401 | 0.0167 |  | 0.0698 | 0.00187 |  | 457 | 31 |  | 438 | 11 |  | 435 | 11 |
| 27 | 105.4 | 33.7 | 0.32 | 0.53374 | 0.01625 | | |  | 0.53374 | 0.01625 |  | 0.06969 | 0.00186 |  | 434 | 30 |  | 434 | 11 |  | 434 | 11 |
| Mean age | |  |  |  |  | | |  |  |  |  |  |  |  |  |  |  |  |  |  | **434.4** | **5.2** |
| BS17-3 (41º24´53.3´´N, 99º20´16.2´´E) | | | | | | | |  |  |  |  |  |  |  |  |  |  |  |  |  |  |  |
| 1 | 143.3 | 111.9 | 0.78 | 0.0562 | 0.00423 | | |  | 0.51263 | 0.0371 |  | 0.06616 | 0.00189 |  | 460 | 110 |  | 420 | 25 |  | 413 | 11 |
| 2 | 61.5 | 53.5 | 0.87 | 0.05745 | 0.00247 | | |  | 0.52258 | 0.02127 |  | 0.06598 | 0.00133 |  | 509 | 54 |  | 427 | 14 |  | 412 | 8 |
| 3 | 372.6 | 149.1 | 0.40 | 0.05723 | 0.0014 | | |  | 0.63072 | 0.01375 |  | 0.07993 | 0.00141 |  | 500 | 22 |  | 497 | 9 |  | ~~496~~ | ~~8~~ |
| 4 | 65.2 | 63.0 | 0.97 | 0.05639 | 0.00273 | | |  | 0.51218 | 0.02362 |  | 0.06587 | 0.00141 |  | 468 | 64 |  | 420 | 16 |  | 411 | 9 |
| 5 | 62.6 | 53.5 | 0.86 | 0.05515 | 0.00238 | | |  | 0.49978 | 0.02049 |  | 0.06573 | 0.00131 |  | 418 | 56 |  | 412 | 14 |  | 410 | 8 |
| 6 | 108.0 | 75.4 | 0.70 | 0.05507 | 0.00183 | | |  | 0.4993 | 0.01539 |  | 0.06576 | 0.00123 |  | 415 | 37 |  | 411 | 10 |  | 411 | 7 |
| 7 | 51.4 | 39.0 | 0.76 | 0.0554 | 0.00241 | | |  | 0.50316 | 0.02084 |  | 0.06587 | 0.00131 |  | 428 | 57 |  | 414 | 14 |  | 411 | 8 |
| 8 | 125.7 | 116.0 | 0.92 | 0.05531 | 0.00176 | | |  | 0.50302 | 0.01481 |  | 0.06597 | 0.00122 |  | 425 | 35 |  | 414 | 10 |  | 412 | 7 |
| 9 | 73.8 | 62.6 | 0.85 | 0.05564 | 0.00281 | | |  | 0.50812 | 0.02447 |  | 0.06624 | 0.00143 |  | 438 | 69 |  | 417 | 16 |  | 413 | 9 |
| 10 | 196.9 | 275.7 | 1.40 | 0.05622 | 0.00384 | | |  | 0.5092 | 0.03331 |  | 0.06569 | 0.00176 |  | 461 | 98 |  | 418 | 22 |  | 410 | 11 |
| 11 | 115.2 | 91.6 | 0.79 | 0.05687 | 0.00174 | | |  | 0.51581 | 0.01455 |  | 0.06579 | 0.00121 |  | 486 | 32 |  | 422 | 10 |  | 411 | 7 |
| 12 | 69.8 | 57.0 | 0.82 | 0.05572 | 0.00269 | | |  | 0.51015 | 0.0234 |  | 0.0664 | 0.00143 |  | 441 | 64 |  | 419 | 16 |  | 414 | 9 |
| 13 | 83.5 | 83.4 | 1.00 | 0.05642 | 0.00273 | | |  | 0.51226 | 0.02361 |  | 0.06585 | 0.00142 |  | 469 | 64 |  | 420 | 16 |  | 411 | 9 |
| 14 | 91.8 | 98.7 | 1.07 | 0.05547 | 0.00194 | | |  | 0.50301 | 0.01647 |  | 0.06576 | 0.00124 |  | 431 | 41 |  | 414 | 11 |  | 411 | 8 |
| 15 | 256.7 | 396.6 | 1.54 | 0.05722 | 0.00165 | | |  | 0.51817 | 0.01365 |  | 0.06568 | 0.0012 |  | 500 | 29 |  | 424 | 9 |  | 410 | 7 |
| 16 | 121.9 | 133.9 | 1.10 | 0.05603 | 0.00289 | | |  | 0.50846 | 0.025 |  | 0.06581 | 0.00148 |  | 454 | 69 |  | 417 | 17 |  | 411 | 9 |
| 17 | 76.7 | 66.9 | 0.87 | 0.05631 | 0.00224 | | |  | 0.51137 | 0.01917 |  | 0.06586 | 0.00131 |  | 465 | 49 |  | 419 | 13 |  | 411 | 8 |
| 18 | 133.8 | 151.2 | 1.13 | 0.05558 | 0.00185 | | |  | 0.50446 | 0.01563 |  | 0.06582 | 0.00124 |  | 436 | 37 |  | 415 | 11 |  | 411 | 7 |
| 19 | 89.6 | 103.2 | 1.15 | 0.05849 | 0.00376 | | |  | 0.53233 | 0.03278 |  | 0.066 | 0.0017 |  | 548 | 90 |  | 433 | 22 |  | 412 | 10 |
| 20 | 62.4 | 64.9 | 1.04 | 0.05524 | 0.00217 | | |  | 0.50038 | 0.01857 |  | 0.0657 | 0.00127 |  | 422 | 49 |  | 412 | 13 |  | 410 | 8 |
| 21 | 98.6 | 96.6 | 0.98 | 0.05608 | 0.00757 | | |  | 0.54368 | 0.0709 |  | 0.07031 | 0.00321 |  | 456 | 209 |  | 441 | 47 |  | ~~438~~ | ~~19~~ |
| 22 | 105.0 | 81.8 | 0.78 | 0.05595 | 0.00189 | | |  | 0.50633 | 0.01594 |  | 0.06564 | 0.00123 |  | 450 | 38 |  | 416 | 11 |  | 410 | 7 |
| 23 | 147.1 | 202.6 | 1.38 | 0.05578 | 0.00164 | | |  | 0.5044 | 0.0136 |  | 0.06559 | 0.0012 |  | 444 | 30 |  | 415 | 9 |  | 410 | 7 |
| 24 | 167.9 | 237.1 | 1.41 | 0.05531 | 0.00309 | | |  | 0.50929 | 0.02715 |  | 0.06678 | 0.00158 |  | 425 | 77 |  | 418 | 18 |  | 417 | 10 |
| Mean age | |  |  |  |  | | |  |  |  |  |  |  |  |  |  |  |  |  |  | **411.2** | **3.4** |
| BS44-1 (41º23´22.4´´N, 99º23´43.6´´E) | | | | | | | | | |  |  |  |  |  |  |  |  |  |  |  |  |  |
| 1 | 364.5 | 303.6 | 0.83 | 0.05595 | 0.00182 | | |  | 0.52643 | 0.01892 |  | 0.06822 | 0.00181 |  | 450 | 38 |  | 429 | 13 |  | 425 | 11 |
| 2 | 315.6 | 245.6 | 0.78 | 0.05871 | 0.00133 | | |  | 0.55824 | 0.01633 |  | 0.06898 | 0.00193 |  | 556 | 29 |  | 450 | 11 |  | 430 | 12 |
| 3 | 279.8 | 119.5 | 0.43 | 0.05699 | 0.00128 | | |  | 0.54277 | 0.01505 |  | 0.06906 | 0.0018 |  | 491 | 27 |  | 440 | 10 |  | 430 | 11 |
| 4 | 252.3 | 110.6 | 0.44 | 0.05691 | 0.00145 | | |  | 0.54508 | 0.01642 |  | 0.06944 | 0.00182 |  | 488 | 30 |  | 442 | 11 |  | 433 | 11 |
| 5 | 207.7 | 131.5 | 0.63 | 0.05651 | 0.00159 | | |  | 0.53952 | 0.01741 |  | 0.06922 | 0.00183 |  | 472 | 32 |  | 438 | 11 |  | 431 | 11 |
| 6 | 191.9 | 91.4 | 0.48 | 0.05894 | 0.00236 | | |  | 0.56359 | 0.02397 |  | 0.06933 | 0.0019 |  | 565 | 48 |  | 454 | 16 |  | 432 | 11 |
| 7 | 118.0 | 73.8 | 0.63 | 0.06013 | 0.00194 | | |  | 0.57512 | 0.02062 |  | 0.06934 | 0.00187 |  | 608 | 37 |  | 461 | 13 |  | 432 | 11 |
| 8 | 93.9 | 69.3 | 0.74 | 0.05787 | 0.00178 | | |  | 0.55154 | 0.01913 |  | 0.06909 | 0.00186 |  | 525 | 35 |  | 446 | 13 |  | 431 | 11 |
| 9 | 198.0 | 235.5 | 1.19 | 0.0561 | 0.00221 | | |  | 0.53504 | 0.02257 |  | 0.06915 | 0.00191 |  | 456 | 48 |  | 435 | 15 |  | 431 | 12 |
| 10 | 290.3 | 424.2 | 1.46 | 0.05558 | 0.0013 | | |  | 0.53068 | 0.01528 |  | 0.06923 | 0.00184 |  | 436 | 29 |  | 432 | 10 |  | 432 | 11 |
| 11 | 72.7 | 42.1 | 0.58 | 0.05692 | 0.00154 | | |  | 0.54409 | 0.01722 |  | 0.06931 | 0.00186 |  | 488 | 31 |  | 441 | 11 |  | 432 | 11 |
| 12 | 174.1 | 78.5 | 0.45 | 0.05629 | 0.00149 | | |  | 0.53786 | 0.01678 |  | 0.06928 | 0.00186 |  | 464 | 31 |  | 437 | 11 |  | 432 | 11 |
| 13 | 269.5 | 312.2 | 1.16 | 0.0556 | 0.0014 | | |  | 0.53271 | 0.0162 |  | 0.06947 | 0.00187 |  | 436 | 30 |  | 434 | 11 |  | 433 | 11 |
| 14 | 142.2 | 95.6 | 0.67 | 0.06155 | 0.0043 | | |  | 0.58888 | 0.0414 |  | 0.06936 | 0.00219 |  | 659 | 97 |  | 470 | 26 |  | 432 | 13 |
| 15 | 227.1 | 42.7 | 0.19 | 0.06378 | 0.00271 | | |  | 0.61169 | 0.02756 |  | 0.06954 | 0.00198 |  | 734 | 50 |  | 485 | 17 |  | 433 | 12 |
| 16 | 170.2 | 126.8 | 0.75 | 0.05669 | 0.00176 | | |  | 0.54112 | 0.01902 |  | 0.0692 | 0.0019 |  | 479 | 36 |  | 439 | 13 |  | 431 | 11 |
| 17 | 190.0 | 206.9 | 1.09 | 0.05834 | 0.00268 | | |  | 0.55715 | 0.02688 |  | 0.06924 | 0.00199 |  | 543 | 57 |  | 450 | 18 |  | 432 | 12 |
| 18 | 122.0 | 99.3 | 0.81 | 0.05866 | 0.00179 | | |  | 0.55876 | 0.01946 |  | 0.06906 | 0.0019 |  | 555 | 35 |  | 451 | 13 |  | 430 | 11 |
| 19 | 220.2 | 115.0 | 0.52 | 0.05548 | 0.00153 | | |  | 0.52853 | 0.01723 |  | 0.06907 | 0.0019 |  | 432 | 33 |  | 431 | 11 |  | 431 | 11 |
| 20 | 66.4 | 36.5 | 0.55 | 0.06072 | 0.0024 | | |  | 0.5801 | 0.02474 |  | 0.06927 | 0.00197 |  | 629 | 46 |  | 465 | 16 |  | 432 | 12 |
| 21 | 126.3 | 71.8 | 0.57 | 0.06353 | 0.00165 | | |  | 0.60439 | 0.01894 |  | 0.06899 | 0.0019 |  | 726 | 30 |  | 480 | 12 |  | 430 | 11 |
| 22 | 180.0 | 148.3 | 0.82 | 0.05641 | 0.00151 | | |  | 0.53739 | 0.01722 |  | 0.06908 | 0.00191 |  | 469 | 32 |  | 437 | 11 |  | 431 | 12 |
| 23 | 266.6 | 303.8 | 1.14 | 0.05709 | 0.00131 | | |  | 0.5454 | 0.01592 |  | 0.06928 | 0.0019 |  | 495 | 29 |  | 442 | 10 |  | 432 | 11 |
| 24 | 147.4 | 117.3 | 0.80 | 0.0562 | 0.00159 | | |  | 0.53616 | 0.01791 |  | 0.06919 | 0.00192 |  | 460 | 33 |  | 436 | 12 |  | 431 | 12 |
| 25 | 153.6 | 86.7 | 0.56 | 0.05612 | 0.00147 | | |  | 0.53416 | 0.01701 |  | 0.06904 | 0.00192 |  | 457 | 32 |  | 435 | 11 |  | 430 | 12 |
| 26 | 128.1 | 66.6 | 0.52 | 0.05927 | 0.00184 | | |  | 0.56626 | 0.02028 |  | 0.0693 | 0.00196 |  | 577 | 36 |  | 456 | 13 |  | 432 | 12 |
| Mean age | |  |  |  |  | | |  |  |  |  |  |  |  |  |  |  |  |  |  | **431.2** | **4.4** |
| BA11-60 | | (41º23´34.4´´N, 99º22´52.3´´E) | | | | | | |  |  |  |  |  |  |  |  |  |  |  |  |  |  |
| 1 | 176.7 | 190.7 | 1.08 | 0.06328 | 0.00385 | | |  | 0.81617 | 0.0503 |  | 0.09353 | 0.00278 |  | 718 | 81 |  | 606 | 28 |  | ~~576~~ | ~~16~~ |
| 2 | 251.4 | 295.0 | 1.17 | 0.05536 | 0.00157 | | |  | 0.51611 | 0.0167 |  | 0.0676 | 0.00179 |  | 427 | 33 |  | 423 | 11 |  | 422 | 11 |
| 3 | 359.8 | 491.9 | 1.37 | 0.05613 | 0.00123 | | |  | 0.5212 | 0.01417 |  | 0.06733 | 0.00176 |  | 458 | 27 |  | 426 | 9 |  | 420 | 11 |
| 4 | 268.9 | 297.4 | 1.11 | 0.05576 | 0.00125 | | |  | 0.51881 | 0.01433 |  | 0.06746 | 0.00177 |  | 443 | 28 |  | 424 | 10 |  | 421 | 11 |
| 5 | 447.7 | 235.8 | 0.53 | 0.05567 | 0.00161 | | |  | 0.51303 | 0.01682 |  | 0.06683 | 0.00177 |  | 439 | 33 |  | 420 | 11 |  | 417 | 11 |
| 6 | 305.8 | 339.3 | 1.11 | 0.05614 | 0.00151 | | |  | 0.5208 | 0.01624 |  | 0.06727 | 0.00178 |  | 458 | 31 |  | 426 | 11 |  | 420 | 11 |
| 7 | 445.5 | 550.6 | 1.24 | 0.0563 | 0.0014 | | |  | 0.52282 | 0.01549 |  | 0.06734 | 0.00177 |  | 464 | 29 |  | 427 | 10 |  | 420 | 11 |
| 8 | 330.3 | 99.6 | 0.30 | 0.05628 | 0.00214 | | |  | 0.52376 | 0.02136 |  | 0.06749 | 0.00184 |  | 463 | 46 |  | 428 | 14 |  | 421 | 11 |
| 9 | 162.2 | 156.4 | 0.96 | 0.05609 | 0.00166 | | |  | 0.52211 | 0.01744 |  | 0.06749 | 0.0018 |  | 456 | 34 |  | 427 | 12 |  | 421 | 11 |
| 10 | 267.5 | 302.1 | 1.13 | 0.05548 | 0.00123 | | |  | 0.51817 | 0.01424 |  | 0.06772 | 0.00178 |  | 432 | 28 |  | 424 | 10 |  | 422 | 11 |
| 11 | 346.1 | 354.2 | 1.02 | 0.05561 | 0.00296 | | |  | 0.52029 | 0.02842 |  | 0.06784 | 0.00195 |  | 437 | 71 |  | 425 | 19 |  | 423 | 12 |
| 12 | 279.1 | 289.2 | 1.04 | 0.05586 | 0.00224 | | |  | 0.51941 | 0.02215 |  | 0.06742 | 0.00185 |  | 447 | 49 |  | 425 | 15 |  | 421 | 11 |
| 13 | 369.9 | 540.8 | 1.46 | 0.05553 | 0.00258 | | |  | 0.51488 | 0.02494 |  | 0.06724 | 0.00188 |  | 434 | 60 |  | 422 | 17 |  | 420 | 11 |
| 14 | 332.7 | 367.2 | 1.10 | 0.05557 | 0.00127 | | |  | 0.5159 | 0.01445 |  | 0.06732 | 0.00177 |  | 435 | 28 |  | 422 | 10 |  | 420 | 11 |
| 15 | 265.7 | 311.2 | 1.17 | 0.05564 | 0.00148 | | |  | 0.51529 | 0.01602 |  | 0.06716 | 0.00178 |  | 438 | 31 |  | 422 | 11 |  | 419 | 11 |
| 16 | 130.2 | 137.1 | 1.05 | 0.05918 | 0.00241 | | |  | 0.54878 | 0.02366 |  | 0.06725 | 0.00186 |  | 574 | 49 |  | 444 | 16 |  | 420 | 11 |
| 17 | 266.0 | 291.9 | 1.10 | 0.05547 | 0.00127 | | |  | 0.51619 | 0.0145 |  | 0.06748 | 0.00178 |  | 431 | 28 |  | 423 | 10 |  | 421 | 11 |
| 18 | 189.1 | 173.1 | 0.92 | 0.05536 | 0.00134 | | |  | 0.51471 | 0.015 |  | 0.06742 | 0.00178 |  | 427 | 29 |  | 422 | 10 |  | 421 | 11 |
| 19 | 234.1 | 252.1 | 1.08 | 0.05571 | 0.00129 | | |  | 0.51745 | 0.01467 |  | 0.06736 | 0.00178 |  | 441 | 28 |  | 423 | 10 |  | 420 | 11 |
| 20 | 245.7 | 299.0 | 1.22 | 0.05731 | 0.0024 | | |  | 0.53453 | 0.02363 |  | 0.06764 | 0.00187 |  | 503 | 51 |  | 435 | 16 |  | 422 | 11 |
| 21 | 304.6 | 375.7 | 1.23 | 0.05661 | 0.0018 | | |  | 0.52601 | 0.01863 |  | 0.06738 | 0.00181 |  | 476 | 37 |  | 429 | 12 |  | 420 | 11 |
| 22 | 232.6 | 256.2 | 1.10 | 0.05649 | 0.00156 | | |  | 0.52366 | 0.01669 |  | 0.06721 | 0.00179 |  | 472 | 32 |  | 428 | 11 |  | 419 | 11 |
| 23 | 136.5 | 127.3 | 0.93 | 0.05639 | 0.00203 | | |  | 0.52516 | 0.02054 |  | 0.06754 | 0.00184 |  | 468 | 43 |  | 429 | 14 |  | 421 | 11 |
| 24 | 236.0 | 205.6 | 0.87 | 0.05568 | 0.00184 | | |  | 0.51916 | 0.01898 |  | 0.06761 | 0.00182 |  | 440 | 39 |  | 425 | 13 |  | 422 | 11 |
| 25 | 277.1 | 321.1 | 1.16 | 0.05628 | 0.0013 | | |  | 0.52292 | 0.0148 |  | 0.06737 | 0.00178 |  | 463 | 28 |  | 427 | 10 |  | 420 | 11 |
| 26 | 120.7 | 103.8 | 0.86 | 0.05577 | 0.0014 | | |  | 0.51883 | 0.01554 |  | 0.06745 | 0.00179 |  | 443 | 30 |  | 424 | 10 |  | 421 | 11 |
| 27 | 455.5 | 420.8 | 0.92 | 0.05548 | 0.00135 | | |  | 0.51536 | 0.01509 |  | 0.06736 | 0.00178 |  | 432 | 29 |  | 422 | 10 |  | 420 | 11 |
| 28 | 220.2 | 223.2 | 1.01 | 0.05669 | 0.00147 | | |  | 0.58207 | 0.01778 |  | 0.07445 | 0.00198 |  | 479 | 30 |  | 466 | 11 |  | ~~463~~ | ~~12~~ |
| 29 | 186.8 | 116.5 | 0.62 | 0.0554 | 0.00131 | | |  | 0.51537 | 0.01486 |  | 0.06745 | 0.00178 |  | 428 | 29 |  | 422 | 10 |  | 421 | 11 |
| 30 | 333.8 | 379.8 | 1.14 | 0.05592 | 0.00134 | | |  | 0.54846 | 0.01592 |  | 0.07111 | 0.00188 |  | 449 | 29 |  | 444 | 10 |  | ~~443~~ | ~~11~~ |
| Mean age | |  |  |  |  | |  | |  |  |  |  |  |  |  |  |  |  |  |  | **420.5** | **4.2** |

1.2 SHRIMP data

|  |  |  |  |  |  | Ratios | | | | | | | |  | Ages | | | | |
| --- | --- | --- | --- | --- | --- | --- | --- | --- | --- | --- | --- | --- | --- | --- | --- | --- | --- | --- | --- |
| Spots | U  (ppm | Th  (ppm) | Th/U | 206Pb*  (ppm) | 206Pbc  (%) | 207Pb*/206Pb* | |  | 207Pb*/235U | |  | 206Pb*/238U | |  | 207Pb*/206Pb* | |  | 206Pb*/238U | |
|  |  |  |  |  |  | ratios | ±% |  | ratios | ±% |  | ratios | ±% |  | age | ±1σ |  | age | ±1σ |
| BA11-62 (41º23´34.4´´N, 99º22´52.3´´E) | | | | | | |  |  |  |  |  |  |  |  |  |  |  |  |  |
| 1.1 | 182 | 117 | 0.66 | 10.5 | 1.13 | 0.0571 | 1.8 |  | 0.0912 | 1.3 |  | 0.718 | 2.3 |  | 177 | 120 |  | 413.2 | 4.7 |
| 2.1 | 184 | 170 | 0.96 | 10.6 | 0.56 | 0.0496 | 5.3 |  | 0.06619 | 1.2 |  | 0.453 | 5.5 |  | 419 | 96 |  | 414.1 | 4.2 |
| 3.1 | 91 | 63 | 0.71 | 5.35 | 1.10 | 0.0552 | 4.3 |  | 0.06634 | 1.1 |  | 0.505 | 4.4 |  | 288 | 220 |  | 422.9 | 6.9 |
| 4.1 | 131 | 102 | 0.80 | 7.73 | 0.80 | 0.0521 | 9.5 |  | 0.0678 | 1.7 |  | 0.487 | 9.7 |  | 186 | 190 |  | 426.2 | 6.1 |
| 5.1 | 106 | 90 | 0.87 | 6.03 | 0.00 | 0.0498 | 8.0 |  | 0.0683 | 1.5 |  | 0.469 | 8.1 |  | 380 | 80 |  | 412.0 | 5.8 |
| 6.1 | 110 | 86 | 0.81 | 6.49 | 0.59 | 0.0542 | 3.6 |  | 0.06600 | 1.4 |  | 0.493 | 3.8 |  | 377 | 110 |  | 426.7 | 7.6 |
| 7.1 | 127 | 98 | 0.80 | 7.47 | 0.75 | 0.0541 | 5.1 |  | 0.0684 | 1.8 |  | 0.511 | 5.4 |  | 166 | 140 |  | 422.5 | 5.2 |
| 8.1 | 79 | 60 | 0.79 | 4.54 | 0.00 | 0.0494 | 6.1 |  | 0.06773 | 1.3 |  | 0.461 | 6.2 |  | 555 | 90 |  | 418.2 | 9.1 |
| 9.1 | 252 | 177 | 0.73 | 14.4 | 0.31 | 0.0587 | 4.1 |  | 0.0670 | 2.3 |  | 0.542 | 4.7 |  | 280 | 75 |  | 414.3 | 3.6 |
| 10.1 | 124 | 77 | 0.64 | 6.94 | 0.65 | 0.0519 | 3.3 |  | 0.06637 | 0.90 |  | 0.475 | 3.4 |  | 432 | 150 |  | 404.5 | 6.4 |
| 11.1 | 180 | 160 | 0.92 | 10.3 | 0.93 | 0.0555 | 6.9 |  | 0.0648 | 1.6 |  | 0.495 | 7.1 |  | 292 | 120 |  | 413.2 | 5.1 |
| 12.1 | 220 | 213 | 1.00 | 12.7 | 0.67 | 0.0522 | 5.1 |  | 0.06619 | 1.3 |  | 0.476 | 5.2 |  | 323 | 130 |  | 415.6 | 4.2 |
| 13.1 | 255 | 217 | 0.88 | 14.5 | 0.84 | 0.0529 | 5.8 |  | 0.06659 | 1.1 |  | 0.485 | 5.9 |  | 361 | 75 |  | 408.3 | 4.0 |
| 14.1 | 140 | 80 | 0.59 | 8.10 | 0.40 | 0.0555 | 2.9 |  | 0.06413 | 1.3 |  | 0.491 | 3.1 |  | 361 | 130 |  | 418.9 | 5.2 |
| Mean age | |  |  |  |  |  |  |  |  |  |  |  |  |  |  |  |  | **415.3** | **2.7** |

Notes: Common Pb corrected using the measured 204Pb. Pb* indicate the radiogenic lead, Pbc indicate the common lead. Errors are 1-sigma
